# Supplementary material
Source: publisher site journal article supplement (https://www.dovepress.com/article/559665)
Supplement: Supplementary file 1 [file 559665%20Supplementary%20Material.docx]

**Supplementary Material**

**Table S1** Idenification criteria for disordered eating behaviors in women with gestational diabetes mellitus

| **Disordered eating behavior** | **Idenification criteria** |
| --- | --- |
| Restrictive eating | Women with gestational diabetes mellitus actively have excessively restricted their caloric intake, nutrient intake, or meal frequency for non-medical reasons at least one day per week in the past month. The threshold for excessive restriction is based on the following criteria:   - Caloric intake: for women without pre-pregnancy obesity: < 1500 kcal/day; for women with pre-pregnancy obesity: < 1600 kcal/day - Nutrient intake: carbohydrate intake < 175 g/day, protein intake < 70 g/day and dietary fiber intake < 25 g/day - Meal frequency：<3 main meals/day |
| Binge eating | Women with gestational diabetes mellitus have exhibited loss of dietary self-regulation for at least one day per week in the past month, manifesting as the consumption of subjectively or objectively large amounts of food within discrete episodes (2 hours), accompanied by a feeling of loss of control. |
| Compensatory behavior | Women with gestational diabetes mellitus have implemented behavioral strategies to compensate for at least one episode of excessive food intake per week in the past month, such as self-induced vomiting, excessive exercise, or misuse of laxatives/diuretics. |

**Note.** The specific thresholds for identifying restrictive eating behaviors are based on the Chinese clinical guidelines for hyperglycemia in pregnancy, specifically from the “Guidelines for the Diagnosis and Treatment of Hyperglycemia in Pregnancy (2022) [Part 1]” (jointly issued by the Chinese Society of Obstetrics and Gynecology, Chinese Society of Perinatal Medicine, and Chinese Maternal and Child Health Association).

**Table S2** SCOFF questionnaire items and the National Eating Disorders Collaboration’s recommended pregnancy-adapted mapping question

| **SCOFF item** | **Pregnancy-adapted mapping question** |
| --- | --- |
| S – Do you forcibly make yourself Sick because you feel uncomfortably full? | Are there any signs of frequent, deliberate vomiting, as opposed to expected levels of morning sickness during pregnancy? Have signs of vomiting continued despite regression of morning sickness or nausea? |
| C – Do you feel like you lose Control when you are eating? | Binge eating and other disorders will characteristically involve episodes of uncontrollable eating or a sense of loss of control while eating. Is the patient consuming large amounts of food rapidly or are they eating an unusually excessive amount of food, even when they are full or not hungry? Are they eating with others or frequently eating alone? |
| O – Have you recently lost more than One stone (6.35kgs) in a 3-month period? | Is the individual’s weight in the healthy range relative to their stage of pregnancy? Check for signs that their weight may be staying the same, despite the additional weight of the baby. |
| F – Do you believe yourself to be Fat when others say you are too thin? | Is there distortion in the way the female feels about her body weight or shape? Do they feel uncomfortable with the way their body is changing due to the pregnancy (e.g. “I’m too fat”)? Do others (friends, family) make remarks about their shape or weight (e.g. “You don’t seem to be showing much”)? |
| F – Would you say Food dominates your life? | Is the patient’s attitude towards food within the expected responses for pregnancy? Are they distressed about food or eating? Have they become overly sensitive or irritable when asked about food or eating? |

**Note.** This table presents the original SCOFF items and corresponding pregnancy-adapted mapping question, reproduced from the National Eating Disorders Collaboration (NEDC) resource *Pregnancy and Eating Disorders: A Professional Guide to Assessment and Referral* (available at: https://nedc.com.au/eating-disorder-resources/find-resources/show/pregnancy-and-eating-disorders-a-professional-guide-to-assessment-and-referral).**Table S3** The saturation grid

| **Category** | **Participant**  **Subcategory** | 1 | 2 | 3 | 4 | 5 | 6 | 7 | 8 | 9 | 10 | 11 | 12 | 13 | 14 | 15 | 16 | 17 | 18 | 19 | 20 | 21 | 22 | 23 |
| --- | --- | --- | --- | --- | --- | --- | --- | --- | --- | --- | --- | --- | --- | --- | --- | --- | --- | --- | --- | --- | --- | --- | --- | --- |
| Behavioral characteristics | Obsessed with dietary “victory” | √ | √ |  | √ |  |  | √ | √ | √ | √ | √ | √ |  | √ |  | √ |  |  | √ | √ | √ |  | √ |
| Taut string snapped | √ |  | √ | √ | √ | √ | √ |  |  |  |  |  | √ | √ | √ |  | √ | √ | √ |  | √ | √ |  |
| Insulin use creating sustaining conditions |  | √ |  |  |  |  |  |  |  | √ |  |  |  | √ |  |  |  |  |  |  |  | √ |  |
| Internal drivers | Excessive risk perception |  | √ |  | √ |  |  | √ | √ |  | √ |  | √ |  | √ |  |  |  |  | √ |  |  |  | √ |
| Insufficient intrinsic motivation | √ |  | √ | √ | √ | √ |  |  |  |  |  |  | √ |  | √ |  | √ | √ | √ |  |  | √ |  |
| Low self-efficacy |  | √ | √ |  |  |  | √ |  | √ |  | √ | √ |  |  |  | √ | √ |  |  | √ | √ |  | √ |
| External enablers | Perceived pressure from dietary norms | √ |  |  | √ |  |  | √ | √ | √ | √ |  | √ |  |  |  | √ |  |  | √ | √ |  |  | √ |
| Permissive messaging from significant others |  |  |  |  | √ |  | √ |  |  |  |  |  | √ | √ |  |  |  | √ |  |  | √ | √ |  |
| Disturbance from unexpected events |  |  | √ |  | √ | √ |  |  |  |  |  |  |  |  | √ |  |  | √ |  |  | √ |  |  |
